# Supplementary material
Source: MDPI journal article supplement (https://www.mdpi.com/2306-5338/9/4/59)
Supplement: s1 [file s1]

# Synoptic Time Scale Variability in Precipitation and Streamflows for River Basins over Northern South America

Hernán D. Salas<sup>a,\*</sup>, Juliana Valencia<sup>a</sup>, Alejandro Builes-Jaramillo<sup>a</sup>, Alejandro Jaramillo<sup>b</sup>

<sup>a</sup> Facultad de Arquitectura e Ingeniería. Institución Universitaria Colegio Mayor de Antioquia, Carrera 78 # 65-46 Bloque Patrimonial piso 2, 050034, Medellín, Colombia.

<sup>b</sup> Instituto de Ciencias de la Atmósfera y Cambio Climático, Universidad Nacional Autónoma de México, Investigación Científica s/n, C.U., 04510, Coyoacán, Mexico.

\* Correspondence: [hernan.salas@colmayor.edu.co](mailto:hernan.salas@colmayor.edu.co)

## 1. EMD and EEMD methods

### 1.1. Empirical Mode Decomposition (EMD)

Huang et al. (1999, 1998) proposed that a time series  $x(t)$  can be expressed as,

$$x(t) = \sum_j^n (c_j(t)) + \zeta \quad [\text{S. 1}]$$

where  $c_j$  correspond to the IMFs, and  $\zeta$  is the residual of data. The procedure can be summarized as follows [2]: (1) The extreme maximum and minimum values are identified in  $x(t)$ , (2) the maximal values are connected using a cubic spline to find an upper envelope,  $U_{max}(t)$ . A similar procedure is carried out to the minimal values to find a lower envelope  $L_{min}(t)$ , (3) the mean value between  $U_{max}(t)$  and  $L_{min}(t)$  is estimated  $\left[\bar{U}(t) = \frac{U_{max}(t) - L_{min}(t)}{2}\right]$ , (4) the time series  $\bar{U}$  is substrated of  $x(t)$  as  $[d(t) = x(t) - \bar{U}(t)]$ , (5) the time series  $d(t)$  is considered as the new  $x(t)$  and then steps 1-4 are repeated until finding a signal with zero mean that is the first IMF, (6) The IMF is subtracted from the original time series  $x(t)$  and the procedure is repeated to obtain the next IMF, and (7) stop the iterative process when  $d(t)$  has only one maximum or one minimum value, so that it is not possible to extract more IMFs using  $d(t)$ .

### 1.2. Ensemble Empirical Mode Decomposition (EEMD)

As mentioned above, Wu and Huang (2009) proposed the EEMD as a modified version of the EMD method to solve the “mode mixing” problem. The procedure can be summarized as follows: (1) add white noise series to the original data  $x(t)$ , (2) apply the EMD method to  $x(t)$  with added noise to find the IMFs, (3) repeat steps (1) and (2) several times and, (4) calculate the (ensemble) mean for each IMF, until finding stable values of the IMF for a given error level  $\epsilon$ .

Finally, the added noise series cancel out each other and the mean IMFs remains within the natural dyadic filter windows significantly reducing the chance of mode mixing and preserving the dyadic property [3–5]. This method is counter-intuitive because it uses multiple noise realizations added to a single time series to mimic a scenario of multiple trials of observations which are averaged for the corresponding IMFs allowing to extract scale-consistent signals [5].

## 2. Supplementary tables

**Table S1.** Streamflow gauges from IDEAM, SO-HYBAM, and GRDC.

| ID | Station            | Code     | Dataset  | Area (km <sup>2</sup> ) | Latitude | Longitude |
|----|--------------------|----------|----------|-------------------------|----------|-----------|
| 1  | Puente             | 11037020 | IDEAM    | 1652.9                  | 5.52     | -76.52    |
| 2  | Quibdo             | 11047020 | IDEAM    | 4708.8                  | 5.70     | -76.66    |
| 3  | Bajira             | 11147020 | IDEAM    | 5384.9                  | 5.76     | -76.67    |
| 4  | Belen              | 11047010 | IDEAM    | 5384.9                  | 6.22     | -76.72    |
| 5  | Tado               | 54017040 | IDEAM    | 22932.1                 | 7.18     | -77.03    |
| 6  | Calamar            | 29037020 | IDEAM    | 270895.5                | 10.25    | -74.91    |
| 7  | Macarena           | 32037030 | IDEAM    | 13868.2                 | 2.19     | -73.79    |
| 8  | Puerto AR          | 32107010 | IDEAM    | 35530.0                 | 2.57     | -72.75    |
| 9  | Mapiripana         | 32157010 | IDEAM    | 52436.0                 | 2.80     | -70.53    |
| 10 | Barranco           | 32157060 | IDEAM    | 72209.1                 | 3.57     | -69.59    |
| 11 | Cejal              | 32207010 | IDEAM    | 83633.1                 | 3.99     | -68.35    |
| 12 | Guavare            | 31097010 | IDEAM    | 134887.1                | 3.96     | -67.83    |
| 13 | Puente la Cabana   | 35217030 | IDEAM    | 1034.7                  | 5.44     | -72.46    |
| 14 | Puente Lleras      | 35017020 | IDEAM    | 8617.1                  | 4.10     | -72.94    |
| 15 | Sabana Nueva       | 13077010 | IDEAM    | 10061.4                 | 9.03     | -75.85    |
| 16 | Arrancaplumas      | 21237020 | IDEAM    | 54714.8                 | 5.20     | -74.73    |
| 17 | Puente Ferrocarril | 23147020 | IDEAM    | 1758.4                  | 6.77     | -73.94    |
| 18 | Puerto Araujo      | 23127020 | IDEAM    | 5404.2                  | 6.53     | -74.09    |
| 19 | Santa Rosa         | 23127060 | IDEAM    | 4936.0                  | 6.29     | -74.1     |
| 20 | Aceitico           | 35257040 | IDEAM    | 106252.7                | 6.18     | -68.44    |
| 21 | Aguaverde          | 35267080 | IDEAM    | 76596.5                 | 5.79     | -69.99    |
| 22 | Camp Yucao         | 35127020 | IDEAM    | 2352.7                  | 4.34     | -72.16    |
| 23 | Humapo             | 35117010 | IDEAM    | 26314.7                 | 4.33     | -72.39    |
| 24 | La Estacion        | 35217020 | IDEAM    | 4310.0                  | 4.69     | -71.56    |
| 25 | Playon El          | 35217060 | IDEAM    | 1440.3                  | 5.54     | -72.23    |
| 26 | El Barro           | 35017040 | IDEAM    | 2370.1                  | 3.75     | -73.18    |
| 27 | Piñalito           | 32077070 | IDEAM    | 2377.5                  | 2.97     | -73.68    |
| 28 | Puerto Gaitan      | 35127010 | IDEAM    | 9919.7                  | 4.31     | -72.08    |
| 29 | Puerto Rico        | 32077080 | IDEAM    | 6523.0                  | 2.94     | -73.21    |
| 30 | Quilla La          | 46077010 | IDEAM    | 17583.7                 | -0.93    | -71.78    |
| 31 | Ciudad Bolivar     | 40800000 | SO-HYBAM | 836000.0                | 8.14     | -63.6     |
| 32 | Langa              | 30030000 | SO-HYBAM | 60930.0                 | 5.03     | -54.45    |
| 33 | Caracarai          | 14710000 | SO-HYBAM | 124980.0                | 1.98     | -61.26    |
| 34 | Serrinha           | 14420000 | SO-HYBAM | 279950.0                | -0.57    | -64.86    |
| 35 | Francisco          | 10080900 | SO-HYBAM | 12440.0                 | -0.31    | -77.08    |
| 36 | Tabatinga          | 10100000 | SO-HYBAM | 880250.0                | -4.26    | -70.05    |
| 37 | San Javier         | 3104500  | GRDC     | 1579.0                  | 7.88     | -72.62    |
| 38 | Tado               | 3141300  | GRDC     | 1661.0                  | 5.25     | -76.66    |
| 39 | Mampi              | 3141310  | GRDC     | 1226.0                  | 4.95     | -76.62    |
| 40 | Angosura           | 3141800  | GRDC     | 2511.0                  | 2.95     | -77.23    |
| 41 | Eiido              | 3205220  | GRDC     | 1064.0                  | 8.55     | -71.19    |
| 42 | Puente Torres      | 3205300  | GRDC     | 3590.0                  | 10.20    | -69.9     |
| 43 | Apaikwa            | 3308300  | GRDC     | 14000.0                 | 6.38     | -60.38    |
| 44 | Great Falls        | 3309300  | GRDC     | 2460.0                  | 5.31     | -58.53    |
| 45 | Itabru Falls       | 3309400  | GRDC     | 5100.0                  | 4.88     | -58.23    |
| 46 | Acanaui            | 3621200  | GRDC     | 242259.0                | -1.82    | -66.6     |
| 47 | Vinces-DCP         | 3844450  | GRDC     | 4400.0                  | -1.55    | -79.75    |

### 3. Supplementary Figures

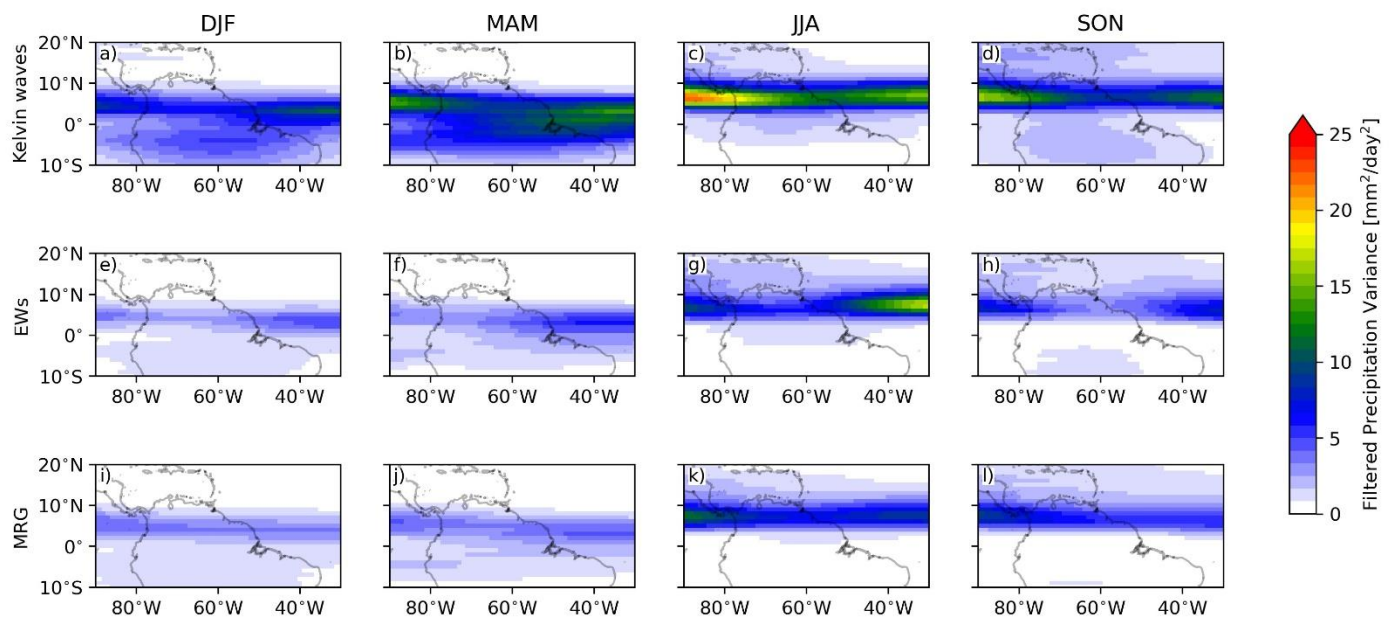

**Figure S1.** Geographical distribution of ERA5 precipitation variance for the seasons DJF (first column), MAM (second column), JJA (third column) and SON (fourth column) for a,b,c,d) Kelvin waves, e,f,g,h) Easterly waves (EWs) and i,j,k,l) mixed Rossby-gravity (MRG) waves.

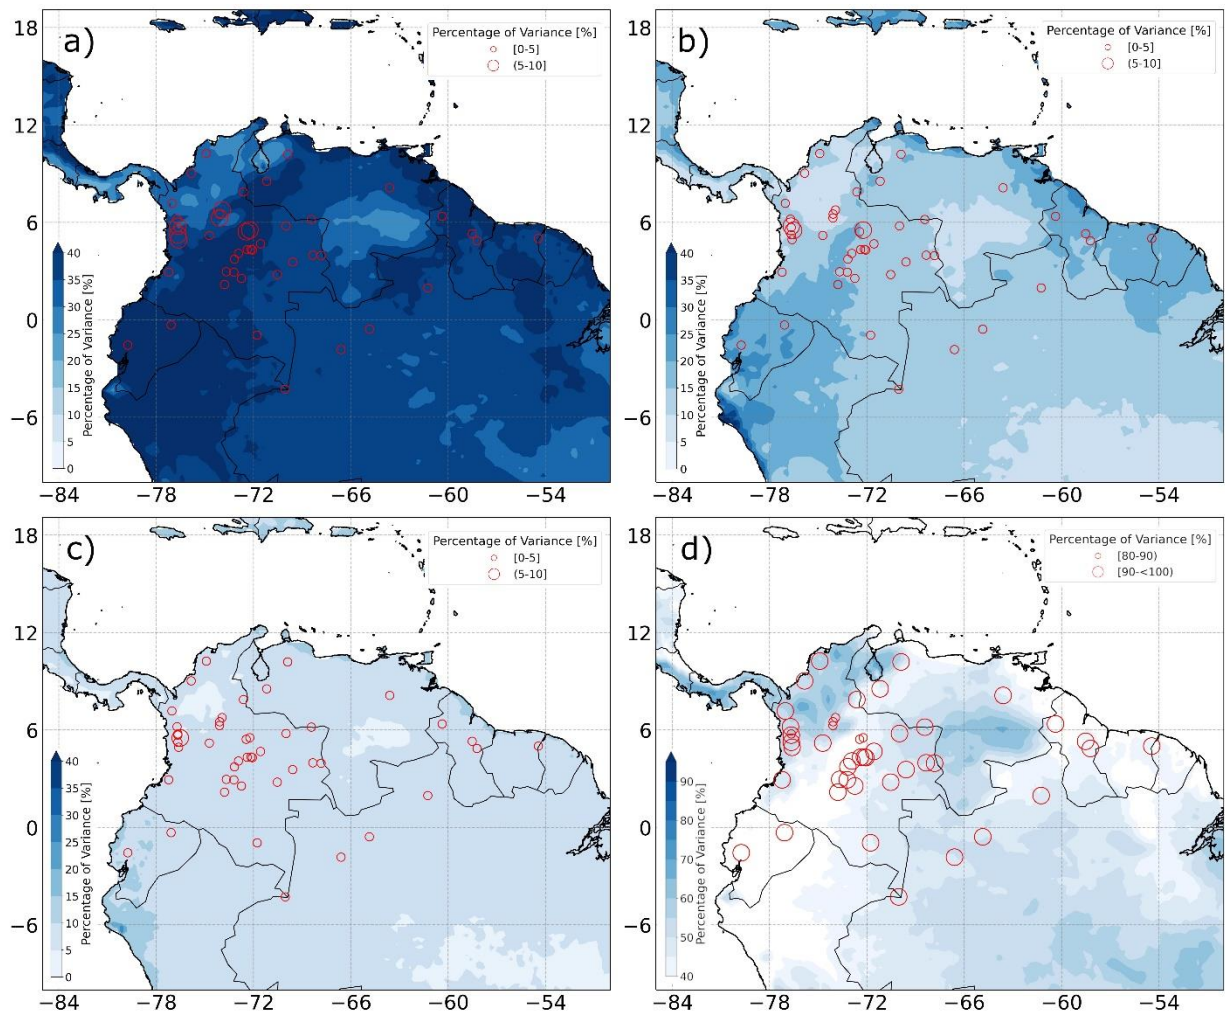

**Figure S2.** Percentage of the total variance explained by the synoptic modes of variability for daily precipitation over the region of study, and streamflows of each catchment (red circles). a) IMF 1; b) IMF 2; c) IMF 3; d) Variance explained by the other frequency bands.

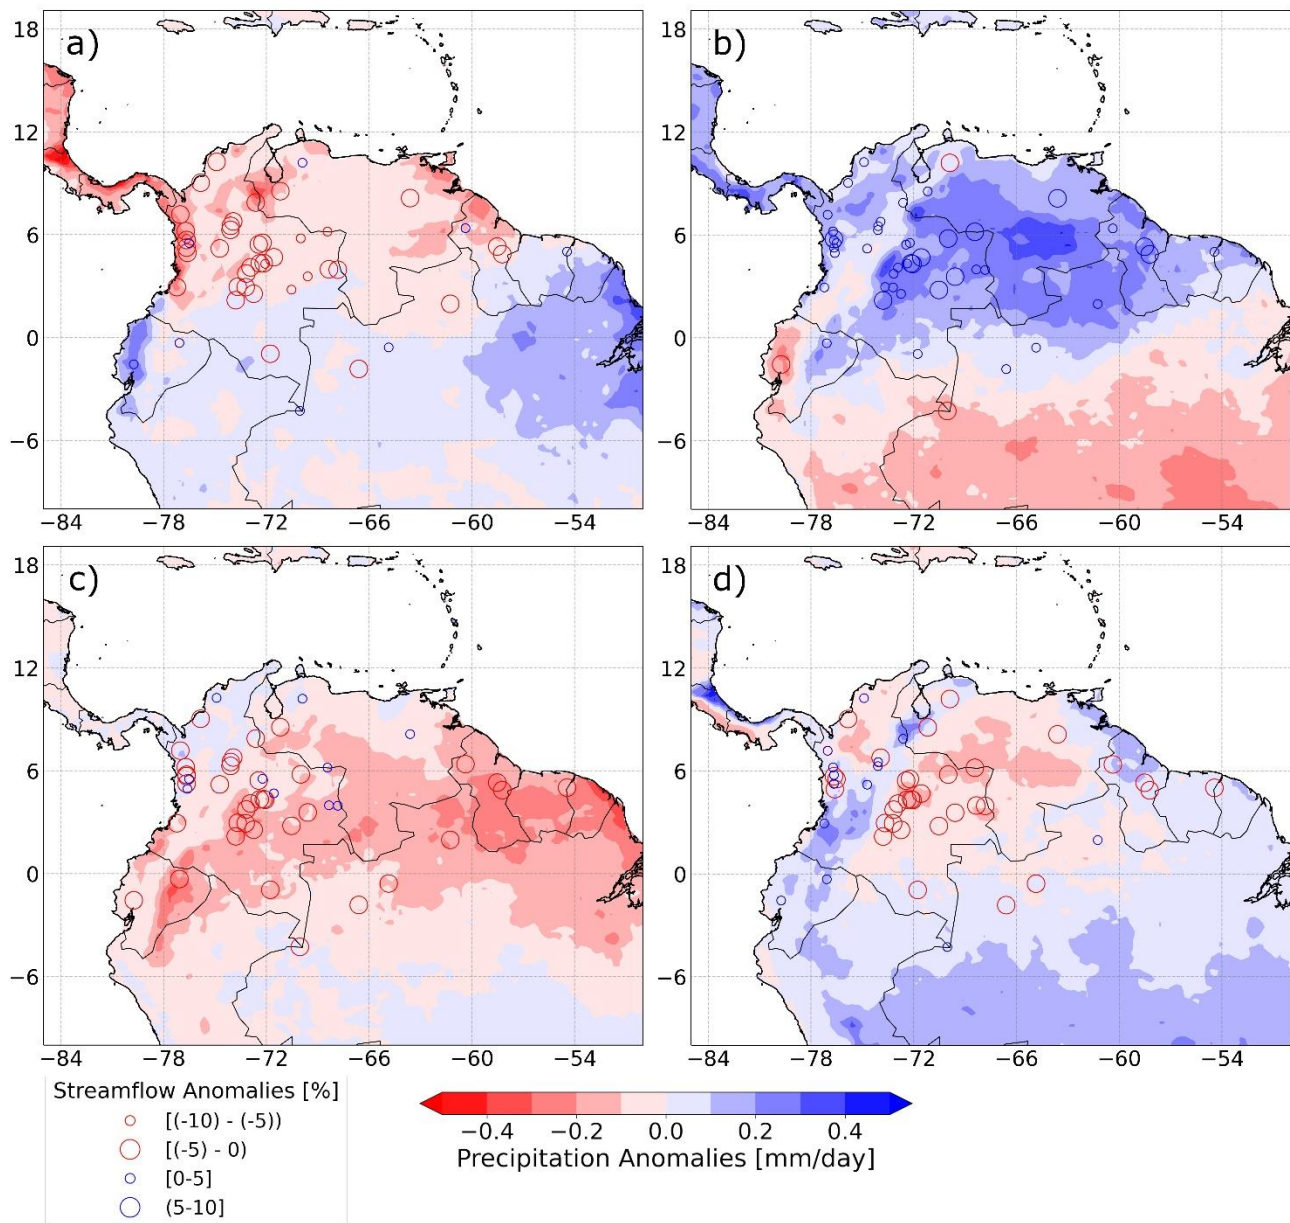

**Figure S3.** Seasonal synoptic anomalies of precipitation (colors) and streamflows (circles), over theregion of study for the period 1981-2019. a) DJF; b) MAM; c) JJA; d) SON.

---

## References

1. Huang, N.E.; Shen, Z.; Long, S.R. A New View of Nonlinear Water Waves: The Hilbert Spectrum. *Annual Review of Fluid Mechanics* **1999**, *31*, 417–457, doi:10.1146/annurev.fluid.31.1.417.
2. Huang, N.E.; Shen, Z.; Long, S.R.; Wu, M.C.; Shih, H.H.; Zheng, Q.; Yen, N.-C.; Tung, C.C.; Liu, H.H. The Empirical Mode Decomposition and the Hilbert Spectrum for Nonlinear and Non-Stationary Time Series Analysis. *Proceedings of the Royal Society of London. Series A: Mathematical, Physical and Engineering Sciences* **1998**, *454*, 903–995, doi:10.1098/rspa.1998.0193.
3. Wu, Z.; Huang, N.E. Ensemble Empirical Mode Decomposition: A Noise-Assisted Data Analysis Method. *Advances in Adaptive Data Analysis* **2009**, *01*, 1–41, doi:10.1142/S1793536909000047.
4. Flandrin, P.; Rilling, G.; Goncalves, P. Empirical Mode Decomposition as a Filter Bank. *IEEE Signal Processing Letters* **2004**, *11*, 112–114, doi:10.1109/LSP.2003.821662.
5. Wu, Z.; Schneider, E.K.; Kirtman, B.P.; Sarachik, E.S.; Huang, N.E.; Tucker, C.J. The Modulated Annual Cycle: An Alternative Reference Frame for Climate Anomalies. *Climate Dynamics* **2008**, *31*, 823–841, doi:10.1007/s00382-008-0437-z.
